# Supplementary material for: Integration of organic electrochemical transistors and immuno-affinity membranes for label-free detection of interleukin-6 in the physiological concentration range through antibody–antigen recognition
Source: Royal Society of Chemistry journal article supplement (doi:10.1039/c8tb01697f), 2018-01-01
Supplement: c8tb01697f1.pdf [file c8tb01697f1.pdf]

## Electronic Supplementary Information

### Integration of Organic Electrochemical Transistors and Immuno-Affinity Membranes for Label-Free Detection of Interleukin-6 at the Physiological Concentration Range through Antibody-Antigen Recognition

Denis Gentili,\* Pasquale D'Angelo, Francesca Militano, Rosalinda Mazzei, Teresa Poerio, Marco Brucale, Giuseppe Tarabella, Simone Bonetti, Simone L. Marasso, Matteo Cocuzza, Lidietta Giorno, Salvatore Iannotta and Massimiliano Cavallini

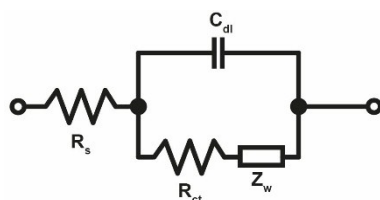

**Figure S1.** Randles equivalent circuit: dynamic solution resistance ( $R_s$ ), double layer capacitance measured between the gold electrode and the electrolyte solution ( $C_{dl}$ ), charge transfer resistance ( $R_{ct}$ ) and Warburg Element ( $Z_w$ ).

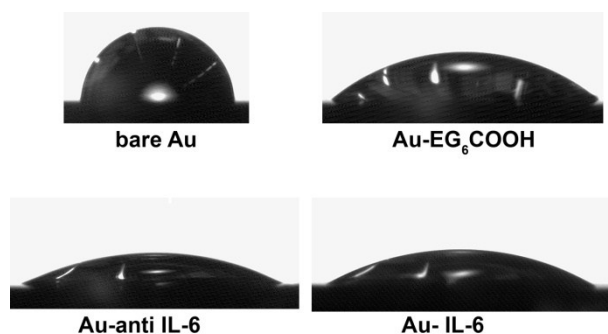

**Figure S2.** Static water contact angle measurements of gold-coated substrates after each functionalization and incubation steps.

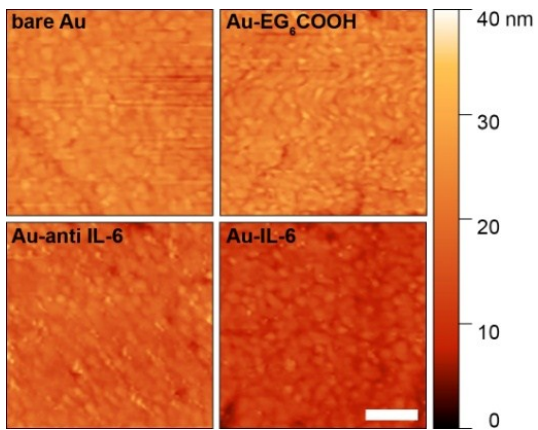

**Figure S3.** AFM images (scale bar: 200 nm) of a gold-coated surface after each functionalization and incubation step.

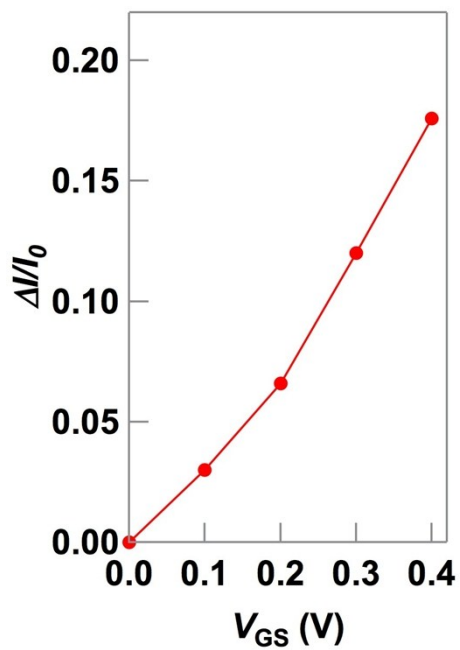

**Figure S4.**  $\Delta I/I_0$  parameter as a function of  $V_{GS}$  ( $V_{DS}$  at -0.1 V) of OECT working with bare Au gate electrode
